# Supplementary material for: Insights into coastal microbial antibiotic resistome through a meta-transcriptomic approach in Yucatan
Source: Front Microbiol. 2022 Oct 17;13:972267. doi: 10.3389/fmicb.2022.972267 (PMC9618888; doi:10.3389/fmicb.2022.972267)
Supplement: Supplementary Table 3 — This table containing sequences annotated as antibiotic resistance genes (ARGs) in Dzilam sample site, containing CARD IDs, ARO IDs, antibiotic classes, and mechanisms of action per line. [file Table_3.XLSX]

## Sheet: final_table_palmar_resubmittion
TRINITY_ID	CARDID	AROID	UniID	KEGGID	Function	Organism	Pathway	Drug	Resistance_Mechanism	TPM_Palmar	TMM_Palmar
TRINITY_DN48827_c0_g1_i1	AAC75089.1	ARO:3003577	O33952	-	UDP-glucose 6-dehydrogenase	Escherichia coli	-	peptide antibiotic	antibiotic target alteration	3.39	18.232
TRINITY_DN47954_c0_g1_i2	AEP40503.1	ARO:3002929	P0A9Q4	sfl:SF4433	Aerobic respiration control protein ArcA	Shigella flexneri	02020|Two-component system	glycopeptide antibiotic	antibiotic target alteration	2.85	15.328
TRINITY_DN85672_c0_g1_i1	BAD59497.1	ARO:3000501	A3DIZ4	cth:Cthe_2724	DNA-directed RNA polymerase subunit beta	Acetivibrio thermocellus (strain ATCC 27405 / DSM 1237 / JCM 9322 / NBRC 103400 / NCIMB 10682 / NRRL B-4536 / VPI 7372)	03020|RNA polymerase	peptide antibiotic;rifamycin antibiotic	antibiotic target alteration;antibiotic target replacement	2.61	14.037
TRINITY_DN2011_c0_g1_i2	AAC16242.1	ARO:3005069	Q1QZW9	csa:Csal_0627	Translational regulator CsrA	Chromohalobacter salexigens (strain ATCC BAA-138 / DSM 3043 / CIP 106854 / NCIMB 13768 / 1H11)	02020|Two-component system	diaminopyrimidine antibiotic;fluoroquinolone antibiotic;phenicol antibiotic	antibiotic efflux	2.58	13.876
TRINITY_DN69692_c0_g1_i1	AAK37618.1	ARO:3005008	G3XCV0	pae:PA1097	Transcriptional regulator FleQ	Pseudomonas aeruginosa (strain ATCC 15692 / DSM 22644 / CIP 104116 / JCM 14847 / LMG 12228 / 1C / PRS 101 / PAO1)	02020|Two-component system;02025|Biofilm formation - Pseudomonas aeruginosa;02040|Flagellar assembly	tetracycline antibiotic	antibiotic efflux	2.46	13.23
TRINITY_DN83986_c0_g1_i1	AAK37619.1	ARO:3000481	P44263	hin:HI_1586	Uncharacterized protein HI_1586; tetracycline resistance efflux pump	Haemophilus influenzae (strain ATCC 51907 / DSM 11121 / KW20 / Rd)	-	tetracycline antibiotic	antibiotic efflux	2.22	11.94
TRINITY_DN412_c0_g1_i1	BAD59497.1	ARO:3000501	Q2JFI5	fra:Francci3_0573	DNA-directed RNA polymerase subunit beta	Frankia casuarinae (strain DSM 45818 / CECT 9043 / CcI3)	03020|RNA polymerase	peptide antibiotic;rifamycin antibiotic	antibiotic target alteration;antibiotic target replacement	2.17	11.671
TRINITY_DN60295_c0_g1_i1	WP_041777404.1	ARO:3004480	Q11QA5	chu:CHU_3169	DNA-directed RNA polymerase subunit beta	Cytophaga hutchinsonii (strain ATCC 33406 / DSM 1761 / CIP 103989 / NBRC 15051 / NCIMB 9469 / D465)	03020|RNA polymerase	peptide antibiotic;rifamycin antibiotic	antibiotic target alteration;antibiotic target replacement	2.02	10.864
TRINITY_DN54185_c0_g1_i1	AAX14802.1	ARO:3000781	P37637	eco:b3514	Multidrug resistance protein MdtF	Escherichia coli (strain K12)	-	carbapenem;cephalosporin;diaminopyrimidine antibiotic;fluoroquinolone antibiotic;lincosamide antibiotic;macrolide antibiotic;penem;phenicol antibiotic;rifamycin antibiotic;tetracycline antibiotic	antibiotic efflux	2.02	10.864
TRINITY_DN70720_c0_g1_i1	TKW44661.1	ARO:3005040	P0AE00	sfl:SF0344	Sec translocon accessory complex subunit YajC	Shigella flexneri	02024|Quorum sensing;03060|Protein export;03070|Bacterial secretion system	cephalosporin;disinfecting agents and antiseptics;fluoroquinolone antibiotic;glycylcycline;penam;phenicol antibiotic;rifamycin antibiotic;tetracycline antibiotic	antibiotic efflux	6.23	10.843
TRINITY_DN97097_c0_g1_i1	BAE77933.1	ARO:3000518	P55222	pae:PA0652	cAMP-activated global transcriptional regulator Vfr	Pseudomonas aeruginosa (strain ATCC 15692 / DSM 22644 / CIP 104116 / JCM 14847 / LMG 12228 / 1C / PRS 101 / PAO1)	02020|Two-component system;02024|Quorum sensing;02025|Biofilm formation - Pseudomonas aeruginosa	fluoroquinolone antibiotic;macrolide antibiotic;penam	antibiotic efflux	6.19	10.773
TRINITY_DN96051_c0_g1_i1	BAD59497.1	ARO:3000501	Q7MGR8	vvy:VV3159	DNA-directed RNA polymerase subunit beta	Vibrio vulnificus (strain YJ016)	03020|RNA polymerase	peptide antibiotic;rifamycin antibiotic	antibiotic target alteration;antibiotic target replacement	6.08	10.581
TRINITY_DN54673_c0_g1_i1	WP_041777404.1	ARO:3004480	A5USR7	rrs:RoseRS_1265	DNA-directed RNA polymerase subunit beta	Roseiflexus sp. (strain RS-1)	03020|RNA polymerase	peptide antibiotic;rifamycin antibiotic	antibiotic target alteration;antibiotic target replacement	1.85	9.95
TRINITY_DN11557_c0_g1_i1	AAG07763.1	ARO:3003031	Q57124	hin:HI_0895	Uncharacterized transporter HI_0895; acriflavine resistance protein (acrB)	Haemophilus influenzae (strain ATCC 51907 / DSM 11121 / KW20 / Rd)	01501|beta-Lactam resistance; 01503|Cationic antimicrobial peptide (CAMP) resistance	disinfecting agents and antiseptics;fluoroquinolone antibiotic;macrolide antibiotic;phenicol antibiotic;tetracycline antibiotic	antibiotic efflux	1.85	9.95
TRINITY_DN49489_c0_g2_i1	AAB05626.1	ARO:3002943	P0A9T3	sfl:SF2898	D-3-phosphoglycerate dehydrogenase	Shigella flexneri	"00260|Glycine, serine and threonine metabolism;00270|Cysteine and methionine metabolism;00680|Methane metabolism"	glycopeptide antibiotic	antibiotic target alteration	4.14	9.57
TRINITY_DN8872_c0_g1_i1	BAD59497.1	ARO:3000501	Q2W2I1	mag:amb3140	DNA-directed RNA polymerase subunit beta	Magnetospirillum magneticum (strain AMB-1 / ATCC 700264)	03020|RNA polymerase	peptide antibiotic;rifamycin antibiotic	antibiotic target alteration;antibiotic target replacement	1.76	9.466
TRINITY_DN58233_c0_g1_i1	AAA20117.1	ARO:3000195	F4K410	ath:AT5G13650	"Putative elongation factor TypA-like SVR3, chloroplastic"	Arabidopsis thaliana	-	tetracycline antibiotic	antibiotic target protection	1.74	9.358
TRINITY_DN76231_c0_g1_i1	APB03219.1	ARO:3003986	P45127	hin:HI_1252	Energy-dependent translational throttle protein EttA	Haemophilus influenzae (strain ATCC 51907 / DSM 11121 / KW20 / Rd)	-	pleuromutilin antibiotic	antibiotic efflux	1.64	8.82
TRINITY_DN75185_c0_g1_i1	AEY83581	ARO:3000510	Q8A9K9	bth:BT_0806	Isoleucine--tRNA ligase	Bacteroides thetaiotaomicron (strain ATCC 29148 / DSM 2079 / JCM 5827 / CCUG 10774 / NCTC 10582 / VPI-5482 / E50)	00970|Aminoacyl-tRNA biosynthesis	mupirocin	antibiotic target alteration	1.57	8.444
TRINITY_DN41430_c0_g1_i1	BAB35162.1	ARO:3000676	P0DOA5	-	DNA-binding protein H-NS	Yersinia enterocolitica	-	cephalosporin;cephamycin;fluoroquinolone antibiotic;macrolide antibiotic;penam;tetracycline antibiotic	antibiotic efflux	2.92	8.028
TRINITY_DN45405_c1_g1_i4	BAD59497.1	ARO:3000501	Q11HB3	mes:Meso_1819	DNA-directed RNA polymerase subunit beta	Chelativorans sp. (strain BNC1)	03020|RNA polymerase	peptide antibiotic;rifamycin antibiotic	antibiotic target alteration;antibiotic target replacement	1.42	7.637
TRINITY_DN59839_c0_g1_i1	BAB38260.1	ARO:3000830	P0AE82	eco:b3911	Sensor histidine kinase CpxA	Escherichia coli (strain K12)	01503|Cationic antimicrobial peptide (CAMP) resistance;02020|Two-component system	aminocoumarin antibiotic;aminoglycoside antibiotic	antibiotic efflux	1.36	7.314
TRINITY_DN52760_c0_g1_i1	BAD59497.1	ARO:3000501	Q7URW6	rba:RB5414	DNA-directed RNA polymerase subunit beta	Rhodopirellula baltica (strain DSM 10527 / NCIMB 13988 / SH1)	03020|RNA polymerase	peptide antibiotic;rifamycin antibiotic	antibiotic target alteration;antibiotic target replacement	1.31	7.045
TRINITY_DN11537_c0_g1_i1	AAK37618.1	ARO:3005008	Q06065	eco:b2220	Regulatory protein AtoC	Escherichia coli (strain K12)	02020|Two-component system	tetracycline antibiotic	antibiotic efflux	1.3	6.992
TRINITY_DN246_c0_g1_i1	AAG05882.1	ARO:3000804	Q8FWV9	bms:BRA0334	Efflux pump membrane transporter BepG	Brucella suis biovar 1 (strain 1330)	-	diaminopyrimidine antibiotic;fluoroquinolone antibiotic;phenicol antibiotic	antibiotic efflux	1.28	6.884
TRINITY_DN74084_c0_g1_i1	CAA53189	ARO:3000521	Q11NV4	chu:CHU_3676	Isoleucine--tRNA ligase	Cytophaga hutchinsonii (strain ATCC 33406 / DSM 1761 / CIP 103989 / NBRC 15051 / NCIMB 9469 / D465)	00970|Aminoacyl-tRNA biosynthesis	mupirocin	antibiotic target alteration	1.27	6.83
TRINITY_DN34408_c0_g1_i1	BAD59497.1	ARO:3000501	Q7MGR8	vvy:VV3159	DNA-directed RNA polymerase subunit beta	Vibrio vulnificus (strain YJ016)	03020|RNA polymerase	peptide antibiotic;rifamycin antibiotic	antibiotic target alteration;antibiotic target replacement	1.74	6.811
TRINITY_DN49959_c0_g1_i3	ADZ12699.1	ARO:3005091	O66188	ag:BAA28288	Thiocyanate hydrolase subunit gamma	Thiobacillus thioparus	-	aminoglycoside antibiotic	antibiotic efflux	3.73	6.71
TRINITY_DN47781_c0_g1_i1	ABA71727.1	ARO:3002926	Q9HV32	pae:PA4776	Response regulator protein PmrA	Pseudomonas aeruginosa (strain ATCC 15692 / DSM 22644 / CIP 104116 / JCM 14847 / LMG 12228 / 1C / PRS 101 / PAO1)	02020|Two-component system;02024|Quorum sensing	glycopeptide antibiotic	antibiotic target alteration	1.47	6.669
TRINITY_DN49913_c0_g2_i1	AEY83581	ARO:3000510	Q8DES7	vvu:VV1_0507	Isoleucine--tRNA ligase	Vibrio vulnificus (strain CMCP6)	00970|Aminoacyl-tRNA biosynthesis	mupirocin	antibiotic target alteration	3.14	6.592
TRINITY_DN64066_c0_g1_i1	BAD59497.1	ARO:3000501	A5USR7	rrs:RoseRS_1265	DNA-directed RNA polymerase subunit beta	Roseiflexus sp. (strain RS-1)	03020|RNA polymerase	peptide antibiotic;rifamycin antibiotic	antibiotic target alteration;antibiotic target replacement	1.2	6.454
TRINITY_DN71721_c0_g1_i1	BAD59497.1	ARO:3000501	Q11QA5	chu:CHU_3169	DNA-directed RNA polymerase subunit beta	Cytophaga hutchinsonii (strain ATCC 33406 / DSM 1761 / CIP 103989 / NBRC 15051 / NCIMB 9469 / D465)	03020|RNA polymerase	peptide antibiotic;rifamycin antibiotic	antibiotic target alteration;antibiotic target replacement	1.2	6.454
TRINITY_DN65811_c0_g1_i1	AAC16242.1	ARO:3005069	Q60BS4	mca:MCA0391	Translational regulator CsrA	Methylococcus capsulatus (strain ATCC 33009 / NCIMB 11132 / Bath)	02020|Two-component system	diaminopyrimidine antibiotic;fluoroquinolone antibiotic;phenicol antibiotic	antibiotic efflux	1.16	6.239
TRINITY_DN14607_c0_g1_i1	ACH87088.1	ARO:3000196	B9MQH0	ate:Athe_0809	Elongation factor G	Caldicellulosiruptor bescii (strain ATCC BAA-1888 / DSM 6725 / Z-1320)	-	tetracycline antibiotic	antibiotic target protection	1.14	6.131
TRINITY_DN45625_c0_g1_i1	AAC74000.1	ARO:3003950	Q8DAV2	vvu:VV1_2085	ATP-dependent lipid A-core flippase	Vibrio vulnificus (strain CMCP6)	02010|ABC transporters	nitroimidazole antibiotic	antibiotic efflux	2.79	6.093
TRINITY_DN78196_c0_g1_i1	BAD59497.1	ARO:3000501	B9LL91	chl:Chy400_0949	DNA-directed RNA polymerase subunit beta	Chloroflexus aurantiacus (strain ATCC 29364 / DSM 637 / Y-400-fl)	03020|RNA polymerase	peptide antibiotic;rifamycin antibiotic	antibiotic target alteration;antibiotic target replacement	3.47	6.039
TRINITY_DN45318_c0_g1_i1	ADZ12699.1	ARO:3005091	P33916	eco:b2180	Uncharacterized ABC transporter ATP-binding protein YejF	Escherichia coli (strain K12)	02010|ABC transporters	aminoglycoside antibiotic	antibiotic efflux	3.34	5.813
TRINITY_DN15581_c0_g1_i1	AAV85982.1	ARO:3000535	Q58903	mja:MJ_1508	Uncharacterized ABC transporter ATP-binding protein MJ1508	Methanocaldococcus jannaschii (strain ATCC 43067 / DSM 2661 / JAL-1 / JCM 10045 / NBRC 100440)	-	macrolide antibiotic	antibiotic efflux	1.08	5.808
TRINITY_DN21229_c0_g1_i1	AAC16242.1	ARO:3005069	Q60BS4	mca:MCA0391	Translational regulator CsrA	Methylococcus capsulatus (strain ATCC 33009 / NCIMB 11132 / Bath)	02020|Two-component system	diaminopyrimidine antibiotic;fluoroquinolone antibiotic;phenicol antibiotic	antibiotic efflux	1.07	5.755
TRINITY_DN55209_c0_g1_i1	BAD59497.1	ARO:3000501	A5F3P5	vco:VC0395_A2730	DNA-directed RNA polymerase subunit beta	Vibrio cholerae serotype O1 (strain ATCC 39541 / Classical Ogawa 395 / O395)	03020|RNA polymerase	peptide antibiotic;rifamycin antibiotic	antibiotic target alteration;antibiotic target replacement	3.15	5.482
TRINITY_DN86537_c0_g1_i1	BAD59497.1	ARO:3000501	B9LL91	chl:Chy400_0949	DNA-directed RNA polymerase subunit beta	Chloroflexus aurantiacus (strain ATCC 29364 / DSM 637 / Y-400-fl)	03020|RNA polymerase	peptide antibiotic;rifamycin antibiotic	antibiotic target alteration;antibiotic target replacement	1	5.378
TRINITY_DN69555_c0_g1_i1	CAA53189	ARO:3000521	Q97ES0	cac:CA_C3038	Isoleucine--tRNA ligase	Clostridium acetobutylicum (strain ATCC 824 / DSM 792 / JCM 1419 / LMG 5710 / VKM B-1787)	00970|Aminoacyl-tRNA biosynthesis	mupirocin	antibiotic target alteration	3.05	5.308
TRINITY_DN66263_c0_g1_i1	AAL68645.1	ARO:3002681	P26838	ag:AAC14737	Chloramphenicol acetyltransferase	Escherichia coli	-	phenicol antibiotic	antibiotic inactivation	0.97	5.217
TRINITY_DN47051_c0_g1_i1	BAD59497.1	ARO:3000501	Q48D29	psp:PSPPH_4599	DNA-directed RNA polymerase subunit beta	Pseudomonas savastanoi pv. phaseolicola (strain 1448A / Race 6)	03020|RNA polymerase	peptide antibiotic;rifamycin antibiotic	antibiotic target alteration;antibiotic target replacement	0.96	5.163
TRINITY_DN18356_c0_g1_i1	BAA15934.1	ARO:3000829	P30847	eco:b2078	Signal transduction histidine-protein kinase BaeS	Escherichia coli (strain K12)	02020|Two-component system	aminocoumarin antibiotic;aminoglycoside antibiotic	antibiotic efflux	0.95	5.109
TRINITY_DN21431_c0_g1_i1	BAD59497.1	ARO:3000501	Q7MGR8	vvy:VV3159	DNA-directed RNA polymerase subunit beta	Vibrio vulnificus (strain YJ016)	03020|RNA polymerase	peptide antibiotic;rifamycin antibiotic	antibiotic target alteration;antibiotic target replacement	1.65	5.054
TRINITY_DN73140_c0_g1_i1	AAC16242.1	ARO:3005069	B1KPS4	swd:Swoo_3338	Translational regulator CsrA	Shewanella woodyi (strain ATCC 51908 / MS32)	02020|Two-component system	diaminopyrimidine antibiotic;fluoroquinolone antibiotic;phenicol antibiotic	antibiotic efflux	0.91	4.894
TRINITY_DN49743_c0_g1_i1	ALV80601.1	ARO:3003801	P28246	eco:b2182	Bicyclomycin resistance protein	Escherichia coli (strain K12)	-	bicyclomycin	antibiotic efflux	1.64	4.892
TRINITY_DN49905_c0_g1_i1	ADZ12699.1	ARO:3005091	P63386	eco:b3195	Intermembrane phospholipid transport system ATP-binding protein MlaF	Escherichia coli (strain K12)	02010|ABC transporters	aminoglycoside antibiotic	antibiotic efflux	1.5	4.83
TRINITY_DN46799_c0_g1_i1	AKA86814	ARO:3003746	P0A9U3	eco:b0820	Probable ATP-binding protein YbiT	Escherichia coli (strain K12)	-	lincosamide antibiotic;macrolide antibiotic;oxazolidinone antibiotic;phenicol antibiotic;pleuromutilin antibiotic;streptogramin antibiotic;tetracycline antibiotic	antibiotic target protection	1.91	4.816
TRINITY_DN98408_c0_g1_i1	BAE77933.1	ARO:3000518	P0ACK1	sfl:SF3376	cAMP-activated global transcriptional regulator CRP	Shigella flexneri	02020|Two-component system;02024|Quorum sensing	fluoroquinolone antibiotic;macrolide antibiotic;penam	antibiotic efflux	2.76	4.803
TRINITY_DN101208_c0_g1_i1	WP_041777404.1	ARO:3004480	Q3Z8V4	det:DET0603	DNA-directed RNA polymerase subunit beta	Dehalococcoides mccartyi (strain ATCC BAA-2266 / KCTC 15142 / 195)	03020|RNA polymerase	peptide antibiotic;rifamycin antibiotic	antibiotic target alteration;antibiotic target replacement	0.87	4.679
TRINITY_DN39031_c0_g1_i1	AAF01499.1	ARO:3000193	Q605A9	mca:MCA2375	Elongation factor G 2	Methylococcus capsulatus (strain ATCC 33009 / NCIMB 11132 / Bath)	-	tetracycline antibiotic	antibiotic target protection	2.68	4.664
TRINITY_DN16474_c0_g1_i1	BAD59497.1	ARO:3000501	A5USR7	rrs:RoseRS_1265	DNA-directed RNA polymerase subunit beta	Roseiflexus sp. (strain RS-1)	03020|RNA polymerase	peptide antibiotic;rifamycin antibiotic	antibiotic target alteration;antibiotic target replacement	1.36	4.622
TRINITY_DN47762_c0_g1_i1	AAK37618.1	ARO:3005008	Q7MM78	vvy:VV1195	Regulatory protein LuxO	Vibrio vulnificus (strain YJ016)	02020|Two-component system;02024|Quorum sensing;05111|Biofilm formation - Vibrio cholerae	tetracycline antibiotic	antibiotic efflux	1.18	4.6
TRINITY_DN59608_c0_g1_i1	WP_104671188.1	ARO:3003948	Q2LVL0	sat:SYN_01564	ATP-dependent lipid A-core flippase	Syntrophus aciditrophicus (strain SB)	02010|ABC transporters	fluoroquinolone antibiotic;macrolide antibiotic;rifamycin antibiotic	antibiotic efflux	0.84	4.518
TRINITY_DN64710_c0_g1_i1	AAG06465.1	ARO:3005063	Q01473	-	Protein RcaC	Microchaete diplosiphon	-	peptide antibiotic	antibiotic efflux;antibiotic target alteration	0.84	4.518
TRINITY_DN44519_c0_g1_i2	ABA71733.1	ARO:3002972	Q8D6Q0	vvu:VV2_0478	Broad specificity amino-acid racemase	Vibrio vulnificus (strain CMCP6)	"00260|Glycine, serine and threonine metabolism;00270|Cysteine and methionine metabolism;00310|Lysine degradation;00470|D-Amino acid metabolism"	glycopeptide antibiotic	antibiotic target alteration	1.52	4.355
TRINITY_DN48183_c0_g1_i1	AAC75429.1	ARO:3000833	Q9F8D7	-	Sensor histidine kinase GacS	Pseudomonas protegens (strain DSM 19095 / LMG 27888 / CFBP 6595 / CHA0)	-	fluoroquinolone antibiotic;macrolide antibiotic;penam;tetracycline antibiotic	antibiotic efflux	1.06	4.282
TRINITY_DN78587_c0_g1_i1	AAV85982.1	ARO:3000535	Q3B5J7	plt:Plut_0496	Macrolide export ATP-binding/permease protein MacB	Chlorobium luteolum (strain DSM 273 / BCRC 81028 / 2530)	02010|ABC transporters	macrolide antibiotic	antibiotic efflux	0.79	4.249
TRINITY_DN38778_c0_g1_i1	AIA35096.1	ARO:3005059	Q7MP83	vvy:VV0481	LPS-assembly protein LptD	Vibrio vulnificus (strain YJ016)	-	aminocoumarin antibiotic;carbapenem;peptide antibiotic;rifamycin antibiotic	antibiotic efflux	1.64	4.237
TRINITY_DN18779_c0_g1_i1	AAC75089.1	ARO:3003577	Q04872	-	UDP-glucose 6-dehydrogenase	Escherichia coli O111:H-	-	peptide antibiotic	antibiotic target alteration	2.42	4.212
TRINITY_DN99684_c0_g1_i1	AAC75089.1	ARO:3003577	P76373	eco:b2028	UDP-glucose 6-dehydrogenase	Escherichia coli (strain K12)	00040|Pentose and glucuronate interconversions;00053|Ascorbate and aldarate metabolism;00520|Amino sugar and nucleotide sugar metabolism;00541|O-Antigen nucleotide sugar biosynthesis	peptide antibiotic	antibiotic target alteration	0.75	4.034
TRINITY_DN50034_c3_g1_i4	AAV85982.1	ARO:3000535	P45768	eco:b3270	Inner membrane amino-acid ABC transporter permease protein YhdY	Escherichia coli (strain K12)	02010|ABC transporters	macrolide antibiotic	antibiotic efflux	0.74	3.98
TRINITY_DN30964_c0_g1_i1	AAR84672.1	ARO:3002925	P37478	bsu:BSU40410	Transcriptional regulatory protein WalR	Bacillus subtilis (strain 168)	02020|Two-component system	glycopeptide antibiotic	antibiotic target alteration	2.19	3.811
TRINITY_DN96526_c0_g1_i1	AAC74000.1	ARO:3003950	Q8DAV2	vvu:VV1_2085	ATP-dependent lipid A-core flippase	Vibrio vulnificus (strain CMCP6)	02010|ABC transporters	nitroimidazole antibiotic	antibiotic efflux	1.26	3.793
TRINITY_DN33643_c0_g1_i1	AAV85981.1	ARO:3000533	P58411	ype:YPO1364	Macrolide export protein MacA	Yersinia pestis	-	macrolide antibiotic	antibiotic efflux	1.62	3.729
TRINITY_DN53060_c0_g1_i1	BAD59497.1	ARO:3000501	B6IRP6	rce:RC1_0701	DNA-directed RNA polymerase subunit beta	Rhodospirillum centenum (strain ATCC 51521 / SW)	03020|RNA polymerase	peptide antibiotic;rifamycin antibiotic	antibiotic target alteration;antibiotic target replacement	0.69	3.711
TRINITY_DN44127_c0_g1_i1	AAC75089.1	ARO:3003577	P76373	eco:b2028	UDP-glucose 6-dehydrogenase	Escherichia coli (strain K12)	00040|Pentose and glucuronate interconversions;00053|Ascorbate and aldarate metabolism;00520|Amino sugar and nucleotide sugar metabolism;00541|O-Antigen nucleotide sugar biosynthesis	peptide antibiotic	antibiotic target alteration	2.1	3.655
TRINITY_DN42446_c0_g1_i1	AAL27442.1	ARO:3002907	Q7ME85	vvy:VVA0785	D-alanine--D-alanine ligase	Vibrio vulnificus (strain YJ016)	00470|D-Amino acid metabolism;00550|Peptidoglycan biosynthesis;01502|Vancomycin resistance	glycopeptide antibiotic	antibiotic target alteration	1.46	3.486
TRINITY_DN39164_c0_g1_i1	BAD59497.1	ARO:3000501	Q2W2I1	mag:amb3140	DNA-directed RNA polymerase subunit beta	Magnetospirillum magneticum (strain AMB-1 / ATCC 700264)	03020|RNA polymerase	peptide antibiotic;rifamycin antibiotic	antibiotic target alteration;antibiotic target replacement	1.66	3.472
TRINITY_DN43751_c0_g1_i1	AAV85982.1	ARO:3000535	P0A9U0	sfl:SF0439	Uncharacterized ABC transporter ATP-binding protein YbbA	Shigella flexneri	-	macrolide antibiotic	antibiotic efflux	1.68	3.47
TRINITY_DN8755_c0_g1_i1	CDO61516.1	ARO:3003949	P54719	bsu:BSU08220	Uncharacterized ABC transporter ATP-binding protein YfiC	Bacillus subtilis (strain 168)	02010|ABC transporters	fluoroquinolone antibiotic;macrolide antibiotic;rifamycin antibiotic	antibiotic efflux	0.64	3.442
TRINITY_DN71159_c0_g1_i1	BAD59497.1	ARO:3000501	Q59191	-	DNA-directed RNA polymerase subunit beta	Borrelia burgdorferi (strain ATCC 35210 / B31 / CIP 102532 / DSM 4680)	-	peptide antibiotic;rifamycin antibiotic	antibiotic target alteration;antibiotic target replacement	1.97	3.429
TRINITY_DN13508_c0_g1_i1	AAA25550.1	ARO:3003105	P04174	-	Dihydrofolate reductase	Neisseria gonorrhoeae	-	diaminopyrimidine antibiotic	antibiotic target replacement	0.63	3.388
TRINITY_DN32394_c0_g1_i1	AAK37618.1	ARO:3005008	P0AFB8	eco:b3868	DNA-binding transcriptional regulator NtrC	Escherichia coli (strain K12)	02020|Two-component system	tetracycline antibiotic	antibiotic efflux	0.63	3.388
TRINITY_DN86334_c0_g1_i1	BAE77933.1	ARO:3000518	P55222	pae:PA0652	cAMP-activated global transcriptional regulator Vfr	Pseudomonas aeruginosa (strain ATCC 15692 / DSM 22644 / CIP 104116 / JCM 14847 / LMG 12228 / 1C / PRS 101 / PAO1)	02020|Two-component system;02024|Quorum sensing;02025|Biofilm formation - Pseudomonas aeruginosa	fluoroquinolone antibiotic;macrolide antibiotic;penam	antibiotic efflux	0.62	3.334
TRINITY_DN50000_c1_g2_i3	AAA20117.1	ARO:3000195	Q7MHN6	vvy:VV2833	Elongation factor 4	Vibrio vulnificus (strain YJ016)	-	tetracycline antibiotic	antibiotic target protection	0.64	3.297
TRINITY_DN47051_c0_g3_i1	BAD59497.1	ARO:3000501	B6IRP6	rce:RC1_0701	DNA-directed RNA polymerase subunit beta	Rhodospirillum centenum (strain ATCC 51521 / SW)	03020|RNA polymerase	peptide antibiotic;rifamycin antibiotic	antibiotic target alteration;antibiotic target replacement	0.6	3.227
TRINITY_DN48381_c0_g1_i1	ATC67679.1	ARO:3000838	P94413	bsu:BSU03750	Uncharacterized transcriptional regulatory protein YclJ	Bacillus subtilis (strain 168)	-	disinfecting agents and antiseptics;fluoroquinolone antibiotic	antibiotic efflux	0.6	3.227
TRINITY_DN43945_c0_g1_i1	AAK37618.1	ARO:3005008	G3XCV0	pae:PA1097	Transcriptional regulator FleQ	Pseudomonas aeruginosa (strain ATCC 15692 / DSM 22644 / CIP 104116 / JCM 14847 / LMG 12228 / 1C / PRS 101 / PAO1)	02020|Two-component system;02025|Biofilm formation - Pseudomonas aeruginosa;02040|Flagellar assembly	tetracycline antibiotic	antibiotic efflux	1.28	3.138
TRINITY_DN43612_c0_g1_i1	ABA71733.1	ARO:3002972	Q7MH94	vvy:VV2978	Alanine racemase	Vibrio vulnificus (strain YJ016)	00470|D-Amino acid metabolism;01502|Vancomycin resistance	glycopeptide antibiotic	antibiotic target alteration	1.38	3.13
TRINITY_DN86660_c0_g1_i1	AAG03548.1	ARO:3003681	Q48815		Protein HelA; Presumed to function with HelC and HelB in efflux of an unidentified substrate	Legionella pneumophila	-	disinfecting agents and antiseptics	antibiotic efflux	0.58	3.119
TRINITY_DN16673_c0_g1_i1	AAG05188.1	ARO:3005068	A0A4P7TS68	-	DNA-binding dual transcriptional regulator OmpR	Shigella flexneri serotype 5a (strain M90T)	-	aminoglycoside antibiotic;carbapenem;cephalosporin;cephamycin;disinfecting agents and antiseptics;fluoroquinolone antibiotic;macrolide antibiotic;monobactam;penam;penem;phenicol antibiotic;tetracycline antibiotic	antibiotic efflux;reduced permeability to antibiotic	1.29	3.082
TRINITY_DN79742_c0_g1_i1	BAD59497.1	ARO:3000501	Q7URW6	rba:RB5414	DNA-directed RNA polymerase subunit beta	Rhodopirellula baltica (strain DSM 10527 / NCIMB 13988 / SH1)	03020|RNA polymerase	peptide antibiotic;rifamycin antibiotic	antibiotic target alteration;antibiotic target replacement	0.56	3.012
TRINITY_DN50755_c0_g1_i1	CAH14033.1	ARO:3004100	P25197	sme:SMa0875	Nodulation protein NolG; NolG efflux transporter	Rhizobium meliloti (strain 1021) (Ensifer meliloti) (Sinorhizobium meliloti)	-	macrolide antibiotic	antibiotic efflux	0.55	2.958
TRINITY_DN39648_c0_g1_i1	ABX00624.1	ARO:3002881	P43672	eco:b0949	ATP-binding protein Uup	Escherichia coli (strain K12)	-	lincosamide antibiotic;macrolide antibiotic;oxazolidinone antibiotic;phenicol antibiotic;pleuromutilin antibiotic;streptogramin antibiotic;tetracycline antibiotic	antibiotic target protection	0.54	2.904
TRINITY_DN46138_c0_g1_i1	AAG07763.1	ARO:3003031	Q57124	hin:HI_0895	Uncharacterized transporter HI_0895	Haemophilus influenzae (strain ATCC 51907 / DSM 11121 / KW20 / Rd)	01501|beta-Lactam resistance;01503|Cationic antimicrobial peptide (CAMP) resistance	disinfecting agents and antiseptics;fluoroquinolone antibiotic;macrolide antibiotic;phenicol antibiotic;tetracycline antibiotic	antibiotic efflux	0.86	2.879
TRINITY_DN45863_c0_g1_i3	ACN32294.1	ARO:3000237	Q9K2Y1	vch:VC_2436	Outer membrane protein TolC	Vibrio cholerae serotype O1 (strain ATCC 39315 / El Tor Inaba N16961)	01501|beta-Lactam resistance;01503|Cationic antimicrobial peptide (CAMP) resistance;02020|Two-component system;03070|Bacterial secretion system	aminocoumarin antibiotic;aminoglycoside antibiotic;carbapenem;cephalosporin;cephamycin;disinfecting agents and antiseptics;fluoroquinolone antibiotic;glycylcycline;macrolide antibiotic;penam;penem;peptide antibiotic;phenicol antibiotic;rifamycin antibiotic;tetracycline antibiotic	antibiotic efflux	0.87	2.86
TRINITY_DN61553_c0_g1_i1	BAD59497.1	ARO:3000501	C0Q9X9	dat:HRM2_36320	DNA-directed RNA polymerase subunit beta	Desulfobacterium autotrophicum (strain ATCC 43914 / DSM 3382 / HRM2)	03020|RNA polymerase	peptide antibiotic;rifamycin antibiotic	antibiotic target alteration;antibiotic target replacement	0.53	2.85
TRINITY_DN49460_c0_g2_i1	APB03219.1	ARO:3003986	P45127	hin:HI_1252	Energy-dependent translational throttle protein EttA	Haemophilus influenzae (strain ATCC 51907 / DSM 11121 / KW20 / Rd)	-	pleuromutilin antibiotic	antibiotic efflux	1.03	2.811
TRINITY_DN45775_c0_g1_i1	AAC74000.1	ARO:3003950	P26760	-	Toxin RTX-I translocation ATP-binding protein	Actinobacillus pleuropneumoniae	-	nitroimidazole antibiotic	antibiotic efflux	0.88	2.804
TRINITY_DN64314_c0_g1_i1	AAC74000.1	ARO:3003950	P45861	bsu:BSU37230	Uncharacterized ABC transporter ATP-binding protein YwjA	Bacillus subtilis (strain 168)	-	nitroimidazole antibiotic	antibiotic efflux	0.52	2.797
TRINITY_DN50720_c0_g1_i1	AAC16242.1	ARO:3005069	Q5QUV8	ilo:IL1737	Translational regulator CsrA	Idiomarina loihiensis (strain ATCC BAA-735 / DSM 15497 / L2-TR)	02020|Two-component system	diaminopyrimidine antibiotic;fluoroquinolone antibiotic;phenicol antibiotic	antibiotic efflux	0.52	2.797
TRINITY_DN10387_c0_g1_i1	AAV85982.1	ARO:3000535	O31711	bsu:BSU14360	Uncharacterized ABC transporter ATP-binding protein YknY	Bacillus subtilis (strain 168)	-	macrolide antibiotic	antibiotic efflux	0.49	2.635
TRINITY_DN47990_c0_g1_i1	AIA35096.1	ARO:3005059	Q7MP83	vvy:VV0481	LPS-assembly protein LptD	Vibrio vulnificus (strain YJ016)	-	aminocoumarin antibiotic;carbapenem;peptide antibiotic;rifamycin antibiotic	antibiotic efflux	0.72	2.599
TRINITY_DN38310_c0_g1_i1	AAC74000.1	ARO:3003950	P45861	bsu:BSU37230	Uncharacterized ABC transporter ATP-binding protein YwjA	Bacillus subtilis (strain 168)	-	nitroimidazole antibiotic	antibiotic efflux	1.42	2.545
TRINITY_DN86810_c0_g1_i1	CDO61516.1	ARO:3003949	P0AAG5	eco:b0449	Multidrug resistance-like ATP-binding protein MdlB	Escherichia coli (strain K12)	02010|ABC transporters	fluoroquinolone antibiotic;macrolide antibiotic;rifamycin antibiotic	antibiotic efflux	1.42	2.471
TRINITY_DN49954_c0_g1_i2	AAC75089.1	ARO:3003577	O33952	-	UDP-glucose 6-dehydrogenase	Escherichia coli	-	peptide antibiotic	antibiotic target alteration	1.38	2.438
TRINITY_DN48381_c0_g1_i2	ATC67679.1	ARO:3000838	Q4L6C6	sha:SH1490	Response regulator ArlR	Staphylococcus haemolyticus (strain JCSC1435)	02020|Two-component system	disinfecting agents and antiseptics;fluoroquinolone antibiotic	antibiotic efflux	0.87	2.424
TRINITY_DN92295_c0_g1_i1	BAD59497.1	ARO:3000501	P22703	ana:alr1594	DNA-directed RNA polymerase subunit beta	Nostoc sp. (strain PCC 7120 / SAG 25.82 / UTEX 2576)	03020|RNA polymerase	peptide antibiotic;rifamycin antibiotic	antibiotic target alteration;antibiotic target replacement	0.45	2.42
TRINITY_DN28382_c0_g1_i1	BAD59497.1	ARO:3000501	B6IRP6	rce:RC1_0701	DNA-directed RNA polymerase subunit beta	Rhodospirillum centenum (strain ATCC 51521 / SW)	03020|RNA polymerase	peptide antibiotic;rifamycin antibiotic	antibiotic target alteration;antibiotic target replacement	0.45	2.42
TRINITY_DN31478_c0_g1_i1	BAD59497.1	ARO:3000501	B8G4U9	cag:Cagg_2707	DNA-directed RNA polymerase subunit beta	Chloroflexus aggregans (strain MD-66 / DSM 9485)	03020|RNA polymerase	peptide antibiotic;rifamycin antibiotic	antibiotic target alteration;antibiotic target replacement	0.44	2.366
TRINITY_DN21725_c0_g1_i1	AAV85982.1	ARO:3000535	Q3B276	plt:Plut_1701	Lipoprotein-releasing system ATP-binding protein LolD 2	Chlorobium luteolum (strain DSM 273 / BCRC 81028 / 2530)	02010|ABC transporters	macrolide antibiotic	antibiotic efflux	0.44	2.366
TRINITY_DN31622_c0_g1_i1	AAV85982.1	ARO:3000535	Q8EIL8	son:SO_0821	Macrolide export ATP-binding/permease protein MacB	Shewanella oneidensis (strain MR-1)	02010|ABC transporters	macrolide antibiotic	antibiotic efflux	1.31	2.353
TRINITY_DN15072_c0_g1_i1	AAK37619.1	ARO:3000481	P44263	hin:HI_1586	Uncharacterized protein HI_1586	Haemophilus influenzae (strain ATCC 51907 / DSM 11121 / KW20 / Rd)	-	tetracycline antibiotic	antibiotic efflux	1.14	2.348
TRINITY_DN51287_c0_g1_i1	BAD59497.1	ARO:3000501	A9B6J3	hau:Haur_0244	DNA-directed RNA polymerase subunit beta	Herpetosiphon aurantiacus (strain ATCC 23779 / DSM 785 / 114-95)	03020|RNA polymerase	peptide antibiotic;rifamycin antibiotic	antibiotic target alteration;antibiotic target replacement	0.43	2.313
TRINITY_DN48957_c0_g1_i1	ADZ12699.1	ARO:3005091	O30506	pae:PA0892	Arginine/ornithine transport ATP-binding protein AotP	Pseudomonas aeruginosa (strain ATCC 15692 / DSM 22644 / CIP 104116 / JCM 14847 / LMG 12228 / 1C / PRS 101 / PAO1)	02010|ABC transporters	aminoglycoside antibiotic	antibiotic efflux	0.42	2.259
TRINITY_DN80264_c0_g1_i1	BAD59497.1	ARO:3000501	B8G4U9	cag:Cagg_2707	DNA-directed RNA polymerase subunit beta	Chloroflexus aggregans (strain MD-66 / DSM 9485)	03020|RNA polymerase	peptide antibiotic;rifamycin antibiotic	antibiotic target alteration;antibiotic target replacement	0.42	2.259
TRINITY_DN40791_c0_g1_i1	AAG07594.1	ARO:3000808	Q57124	hin:HI_0895	Uncharacterized transporter HI_0895	Haemophilus influenzae (strain ATCC 51907 / DSM 11121 / KW20 / Rd)	01501|beta-Lactam resistance;01503|Cationic antimicrobial peptide (CAMP) resistance	disinfecting agents and antiseptics;fluoroquinolone antibiotic;tetracycline antibiotic	antibiotic efflux	0.42	2.259
TRINITY_DN34502_c0_g1_i1	AAV85982.1	ARO:3000535	P57066	vch:VC_1883	Lipoprotein-releasing system ATP-binding protein LolD	Vibrio cholerae serotype O1 (strain ATCC 39315 / El Tor Inaba N16961)	02010|ABC transporters	macrolide antibiotic	antibiotic efflux	0.41	2.205
TRINITY_DN12132_c0_g1_i1	BAD59497.1	ARO:3000501	B8G4U9	cag:Cagg_2707	DNA-directed RNA polymerase subunit beta	Chloroflexus aggregans (strain MD-66 / DSM 9485)	03020|RNA polymerase	peptide antibiotic;rifamycin antibiotic	antibiotic target alteration;antibiotic target replacement	0.39	2.097
TRINITY_DN66651_c0_g1_i1	ABS43151.1	ARO:3000784	Q8G2M6	bms:BR0292	Efflux pump membrane transporter BepE	Brucella suis biovar 1 (strain 1330)	01501|beta-Lactam resistance;01503|Cationic antimicrobial peptide (CAMP) resistance	cephalosporin;fluoroquinolone antibiotic;fusidic acid;macrolide antibiotic	antibiotic efflux	0.39	2.097
TRINITY_DN31620_c0_g1_i1	BAD59497.1	ARO:3000501	B8G4U9	cag:Cagg_2707	DNA-directed RNA polymerase subunit beta	Chloroflexus aggregans (strain MD-66 / DSM 9485)	03020|RNA polymerase	peptide antibiotic;rifamycin antibiotic	antibiotic target alteration;antibiotic target replacement	0.39	2.097
TRINITY_DN87291_c0_g1_i1	BAD59497.1	ARO:3000501	A1SEK1	nca:Noca_0711	DNA-directed RNA polymerase subunit beta	Nocardioides sp. (strain ATCC BAA-499 / JS614)	03020|RNA polymerase	peptide antibiotic;rifamycin antibiotic	antibiotic target alteration;antibiotic target replacement	0.39	2.097
TRINITY_DN39548_c0_g1_i1	AMP42147.1	ARO:3004442	Q7MHN6	vvy:VV2833	Elongation factor 4	Vibrio vulnificus (strain YJ016)	-	tetracycline antibiotic	antibiotic target protection	0.39	2.097
TRINITY_DN49913_c0_g3_i2	CAA53189	ARO:3000521	Q8DES7	vvu:VV1_0507	Isoleucine--tRNA ligase	Vibrio vulnificus (strain CMCP6)	00970|Aminoacyl-tRNA biosynthesis	mupirocin	antibiotic target alteration	0.38	2.044
TRINITY_DN45808_c0_g1_i1	AAK37618.1	ARO:3005008	Q9I4N3	pae:PA1099	Response regulator protein FleR	Pseudomonas aeruginosa (strain ATCC 15692 / DSM 22644 / CIP 104116 / JCM 14847 / LMG 12228 / 1C / PRS 101 / PAO1)	02020|Two-component system;02040|Flagellar assembly	tetracycline antibiotic	antibiotic efflux	0.51	2.015
TRINITY_DN52847_c0_g1_i1	AAV85982.1	ARO:3000535	P63402	-	Uncharacterized ABC transporter ATP-binding protein Mb2593	Mycobacterium bovis (strain ATCC BAA-935 / AF2122/97)	-	macrolide antibiotic	antibiotic efflux	0.37	1.99
TRINITY_DN49377_c0_g1_i1	AAK37618.1	ARO:3005008	Q9APD9	-	Transcriptional regulatory protein ZraR	Klebsiella oxytoca	-	tetracycline antibiotic	antibiotic efflux	0.93	1.946
TRINITY_DN74831_c0_g1_i1	CBL58195.1	ARO:3002831	P0A9U3	eco:b0820	Probable ATP-binding protein YbiT	Escherichia coli (strain K12)	-	lincosamide antibiotic;macrolide antibiotic;oxazolidinone antibiotic;phenicol antibiotic;pleuromutilin antibiotic;streptogramin antibiotic;tetracycline antibiotic	antibiotic target protection	0.36	1.936
TRINITY_DN40458_c0_g1_i1	AAG07594.1	ARO:3000808	B2VFQ4	eta:ETA_13100	Multidrug resistance protein MdtC	Erwinia tasmaniensis (strain DSM 17950 / CFBP 7177 / CIP 109463 / NCPPB 4357 / Et1/99)	02020|Two-component system	disinfecting agents and antiseptics;fluoroquinolone antibiotic;tetracycline antibiotic	antibiotic efflux	0.95	1.908
TRINITY_DN4540_c0_g1_i1	APB03219.1	ARO:3003986	P45127	hin:HI_1252	Energy-dependent translational throttle protein EttA	Haemophilus influenzae (strain ATCC 51907 / DSM 11121 / KW20 / Rd)	-	pleuromutilin antibiotic	antibiotic efflux	0.34	1.829
TRINITY_DN45405_c1_g3_i1	BAD59497.1	ARO:3000501	B9LL91	chl:Chy400_0949	DNA-directed RNA polymerase subunit beta	Chloroflexus aurantiacus (strain ATCC 29364 / DSM 637 / Y-400-fl)	03020|RNA polymerase	peptide antibiotic;rifamycin antibiotic	antibiotic target alteration;antibiotic target replacement	0.34	1.829
TRINITY_DN4815_c0_g1_i1	APB03222.1	ARO:3003992	Q55905	syn:slr0301	Phosphoenolpyruvate synthase	Synechocystis sp. (strain PCC 6803 / Kazusa)	00010|Glycolysis / Gluconeogenesis;00620|Pyruvate metabolism;00680|Methane metabolism	rifamycin antibiotic	antibiotic inactivation	0.34	1.829
TRINITY_DN61398_c0_g1_i1	CAH14033.1	ARO:3004100	Q8FWV9	bms:BRA0334	Efflux pump membrane transporter BepG	Brucella suis biovar 1 (strain 1330)	-	macrolide antibiotic	antibiotic efflux	0.39	1.806
TRINITY_DN88528_c0_g1_i1	AAR84672.1	ARO:3002925	P13792	bsu:BSU29110	Alkaline phosphatase synthesis transcriptional regulatory protein PhoP	Bacillus subtilis (strain 168)	02020|Two-component system	glycopeptide antibiotic	antibiotic target alteration	0.32	1.721
TRINITY_DN40977_c0_g1_i1	AAG07763.1	ARO:3003031	Q57124	hin:HI_0895	Uncharacterized transporter HI_0895	Haemophilus influenzae (strain ATCC 51907 / DSM 11121 / KW20 / Rd)	01501|beta-Lactam resistance;01503|Cationic antimicrobial peptide (CAMP) resistance	disinfecting agents and antiseptics;fluoroquinolone antibiotic;macrolide antibiotic;phenicol antibiotic;tetracycline antibiotic	antibiotic efflux	0.88	1.677
TRINITY_DN67917_c0_g1_i1	BAD59497.1	ARO:3000501	Q8R7U6	tte:TTE2301	DNA-directed RNA polymerase subunit beta	Caldanaerobacter subterraneus subsp. tengcongensis (strain DSM 15242 / JCM 11007 / NBRC 100824 / MB4)	03020|RNA polymerase	peptide antibiotic;rifamycin antibiotic	antibiotic target alteration;antibiotic target replacement	0.31	1.667
TRINITY_DN10944_c0_g1_i1	ADZ12699.1	ARO:3005091	Q9KUI0	vch:VC_0541	Sulfate/thiosulfate import ATP-binding protein CysA	Vibrio cholerae serotype O1 (strain ATCC 39315 / El Tor Inaba N16961)	00920|Sulfur metabolism;02010|ABC transporters	aminoglycoside antibiotic	antibiotic efflux	0.91	1.584
TRINITY_DN41670_c0_g1_i1	AAC75429.1	ARO:3000833	P58363	ece:Z4574	Aerobic respiration control sensor protein ArcB	Escherichia coli O157:H7	02020|Two-component system;02026|Biofilm formation - Escherichia coli	fluoroquinolone antibiotic;macrolide antibiotic;penam;tetracycline antibiotic	antibiotic efflux	0.47	1.581
TRINITY_DN46288_c0_g3_i3	AAF01499.1	ARO:3000193	Q4QMT6	hit:NTHI0747	Elongation factor G	Haemophilus influenzae (strain 86-028NP)	-	tetracycline antibiotic	antibiotic target protection	0.29	1.56
TRINITY_DN47047_c0_g1_i1	AIA35096.1	ARO:3005059	Q8DED5	vvu:VV1_0660	LPS-assembly protein LptD	Vibrio vulnificus (strain CMCP6)	-	aminocoumarin antibiotic;carbapenem;peptide antibiotic;rifamycin antibiotic	antibiotic efflux	0.29	1.56
TRINITY_DN76697_c0_g1_i1	AAK37618.1	ARO:3005008	Q87MX7	vpa:VP2099	Regulatory protein LuxO	Vibrio parahaemolyticus serotype O3:K6 (strain RIMD 2210633)	02020|Two-component system;02024|Quorum sensing;05111|Biofilm formation - Vibrio cholerae	tetracycline antibiotic	antibiotic efflux	0.27	1.452
TRINITY_DN46630_c0_g2_i1	AAF67494.2	ARO:3002522	Q57180	hin:HI_1051	Uncharacterized ABC transporter ATP-binding protein HI_1051	Haemophilus influenzae (strain ATCC 51907 / DSM 11121 / KW20 / Rd)	02010|ABC transporters	aminocoumarin antibiotic	antibiotic efflux	0.26	1.398
TRINITY_DN34934_c0_g1_i1	AAA25550.1	ARO:3003105	P12833	ag:AAA25550	Dihydrofolate reductase type 3	Salmonella typhimurium	-	diaminopyrimidine antibiotic	antibiotic target replacement	0.8	1.392
TRINITY_DN39373_c0_g1_i3	AAC16242.1	ARO:3005069	Q3ILF1	pha:PSHAa0534	Translational regulator CsrA	Pseudoalteromonas translucida (strain TAC 125)	02020|Two-component system	diaminopyrimidine antibiotic;fluoroquinolone antibiotic;phenicol antibiotic	antibiotic efflux	0.24	1.291
TRINITY_DN95045_c0_g1_i1	AAK37619.1	ARO:3000481	P44263	hin:HI_1586	Uncharacterized protein HI_1586	Haemophilus influenzae (strain ATCC 51907 / DSM 11121 / KW20 / Rd)	-	tetracycline antibiotic	antibiotic efflux	0.41	1.259
TRINITY_DN53055_c0_g1_i1	WP_041777404.1	ARO:3004480	A5USR7	rrs:RoseRS_1265	DNA-directed RNA polymerase subunit beta	Roseiflexus sp. (strain RS-1)	03020|RNA polymerase	peptide antibiotic;rifamycin antibiotic	antibiotic target alteration;antibiotic target replacement	0.23	1.237
TRINITY_DN49272_c0_g1_i1	ABA71733.1	ARO:3002972	Q7MH94	vvy:VV2978	Alanine racemase	Vibrio vulnificus (strain YJ016)	00470|D-Amino acid metabolism;01502|Vancomycin resistance	glycopeptide antibiotic	antibiotic target alteration	0.23	1.237
TRINITY_DN54225_c0_g1_i1	BAD59497.1	ARO:3000501	P22703	ana:alr1594	DNA-directed RNA polymerase subunit beta	Nostoc sp. (strain PCC 7120 / SAG 25.82 / UTEX 2576)	03020|RNA polymerase	peptide antibiotic;rifamycin antibiotic	antibiotic target alteration;antibiotic target replacement	0.23	1.237
TRINITY_DN41249_c0_g1_i1	ALV80601.1	ARO:3003801	P28246	eco:b2182	Bicyclomycin resistance protein	Escherichia coli (strain K12)	-	bicyclomycin	antibiotic efflux	0.23	1.237
TRINITY_DN40042_c0_g1_i1	ALH22601.1	ARO:3000620	P37641	eco:b3521	Uncharacterized HTH-type transcriptional regulator YhjC	Escherichia coli (strain K12)	-	fluoroquinolone antibiotic;tetracycline antibiotic	antibiotic efflux	0.23	1.237
TRINITY_DN97777_c0_g1_i1	AAK37618.1	ARO:3005008	Q9APD9	-	Transcriptional regulatory protein ZraR	Klebsiella oxytoca	-	tetracycline antibiotic	antibiotic efflux	0.23	1.237
TRINITY_DN49631_c0_g1_i1	AAK37618.1	ARO:3005008	Q87MX7	vpa:VP2099	Regulatory protein LuxO	Vibrio parahaemolyticus serotype O3:K6 (strain RIMD 2210633)	02020|Two-component system;02024|Quorum sensing;05111|Biofilm formation - Vibrio cholerae	tetracycline antibiotic	antibiotic efflux	0.23	1.237
TRINITY_DN39412_c0_g1_i1	AAG06942.1	ARO:3002985	Q7MGK5	vvy:VV3226	Methionyl-tRNA formyltransferase	Vibrio vulnificus (strain YJ016)	00670|One carbon pool by folate;00970|Aminoacyl-tRNA biosynthesis	peptide antibiotic	antibiotic target alteration	0.67	1.203
TRINITY_DN49937_c1_g3_i1	AAC16242.1	ARO:3005069	Q87LR5	vpa:VP2546	Translational regulator CsrA	Vibrio parahaemolyticus serotype O3:K6 (strain RIMD 2210633)	02020|Two-component system;05111|Biofilm formation - Vibrio cholerae	diaminopyrimidine antibiotic;fluoroquinolone antibiotic;phenicol antibiotic	antibiotic efflux	0.22	1.183
TRINITY_DN21499_c0_g1_i1	WP_001572373.1	ARO:3004684	P30845	eco:b4114	Phosphoethanolamine transferase EptA	Escherichia coli (strain K12)	00540|Lipopolysaccharide biosynthesis;01503|Cationic antimicrobial peptide (CAMP) resistance	peptide antibiotic	antibiotic target alteration	0.22	1.183
TRINITY_DN53916_c0_g1_i1	AAK37618.1	ARO:3005008	P12626	-	Nitrogen fixation protein AnfA	Azotobacter vinelandii	-	tetracycline antibiotic	antibiotic efflux	0.22	1.183
TRINITY_DN42492_c0_g3_i1	BAD59497.1	ARO:3000501	A7HWQ4	pla:Plav_2729	DNA-directed RNA polymerase subunit beta	Parvibaculum lavamentivorans (strain DS-1 / DSM 13023 / NCIMB 13966)	03020|RNA polymerase	peptide antibiotic;rifamycin antibiotic	antibiotic target alteration;antibiotic target replacement	0.22	1.183
TRINITY_DN50345_c0_g1_i1	AAV85982.1	ARO:3000535	A0L0V9	shn:Shewana3_3455	Macrolide export ATP-binding/permease protein MacB	Shewanella sp. (strain ANA-3)	02010|ABC transporters	macrolide antibiotic	antibiotic efflux	0.66	1.149
TRINITY_DN49452_c0_g1_i1	AAC74000.1	ARO:3003950	Q7MJ07	vvy:VV2357	ATP-dependent lipid A-core flippase	Vibrio vulnificus (strain YJ016)	02010|ABC transporters	nitroimidazole antibiotic	antibiotic efflux	0.21	1.129
TRINITY_DN55790_c0_g1_i1	AAG04750.1	ARO:3004077	Q6LQ49	ppr:PBPRA2180	Multidrug resistance protein NorM	Photobacterium profundum (strain SS9)	-	aminoglycoside antibiotic;disinfecting agents and antiseptics;fluoroquinolone antibiotic	antibiotic efflux	0.21	1.129
TRINITY_DN51854_c0_g1_i1	BAD59497.1	ARO:3000501	P77965	syn:sll1787	DNA-directed RNA polymerase subunit beta	Synechocystis sp. (strain PCC 6803 / Kazusa)	03020|RNA polymerase	peptide antibiotic;rifamycin antibiotic	antibiotic target alteration;antibiotic target replacement	0.21	1.129
TRINITY_DN89745_c0_g1_i1	BAD59497.1	ARO:3000501	A7HWQ4	pla:Plav_2729	DNA-directed RNA polymerase subunit beta	Parvibaculum lavamentivorans (strain DS-1 / DSM 13023 / NCIMB 13966)	03020|RNA polymerase	peptide antibiotic;rifamycin antibiotic	antibiotic target alteration;antibiotic target replacement	0.21	1.129
TRINITY_DN93632_c0_g1_i1	AAV85982.1	ARO:3000535	Q5HLN4	ser:SERP1951	Putative hemin import ATP-binding protein HrtA	Staphylococcus epidermidis (strain ATCC 35984 / RP62A)	02010|ABC transporters	macrolide antibiotic	antibiotic efflux	0.61	1.062
TRINITY_DN42495_c0_g1_i1	AAC75429.1	ARO:3000833	Q54YZ9	ddi:DDB_G0277883	Hybrid signal transduction histidine kinase J	Dictyostelium discoideum	-	fluoroquinolone antibiotic;macrolide antibiotic;penam;tetracycline antibiotic	antibiotic efflux	0.19	1.022
TRINITY_DN70209_c0_g1_i1	AAC16242.1	ARO:3005069	Q3YYG7	ssn:SSON_2840	Translational regulator CsrA	Shigella sonnei (strain Ss046)	02020|Two-component system	diaminopyrimidine antibiotic;fluoroquinolone antibiotic;phenicol antibiotic	antibiotic efflux	0.19	1.022
TRINITY_DN50056_c16_g1_i2	BAD59497.1	ARO:3000501	Q7MGR8	vvy:VV3159	DNA-directed RNA polymerase subunit beta	Vibrio vulnificus (strain YJ016)	03020|RNA polymerase	peptide antibiotic;rifamycin antibiotic	antibiotic target alteration;antibiotic target replacement	0.39	0.933
TRINITY_DN76971_c0_g1_i1	AAA20117.1	ARO:3000195	Q2W2I8	mag:amb3133	Elongation factor G	Magnetospirillum magneticum (strain AMB-1 / ATCC 700264)	-	tetracycline antibiotic	antibiotic target protection	0.17	0.914
TRINITY_DN48282_c0_g1_i1	AAC75429.1	ARO:3000833	Q5A599	cal:CAALFM_C702800WA	Histidine protein kinase NIK1	Candida albicans (strain SC5314 / ATCC MYA-2876)	-	fluoroquinolone antibiotic;macrolide antibiotic;penam;tetracycline antibiotic	antibiotic efflux	0.17	0.914
TRINITY_DN14516_c0_g1_i1	AAA20117.1	ARO:3000195	Q87L45	vpa:VP2771	Elongation factor G 1	Vibrio parahaemolyticus serotype O3:K6 (strain RIMD 2210633)	-	tetracycline antibiotic	antibiotic target protection	0.52	0.905
